# Supplementary material for: A Mn-doped Ni2P nanosheet array: an efficient and durable hydrogen evolution reaction electrocatalyst in alkaline media
Source: Royal Society of Chemistry journal article supplement (doi:10.1039/c7cc06278h), 2017-01-01
Supplement: c7cc06278h1.pdf [file c7cc06278h1.pdf]

## Electronic Supplementary Information

### Experimental section

*Materials:*  $\text{NiCl}_2 \cdot 6\text{H}_2\text{O}$ ,  $\text{MnCl}_2 \cdot 4\text{H}_2\text{O}$ ,  $\text{NH}_4\text{F}$ , HMT, KOH, and  $\text{NaH}_2\text{PO}_2$  were purchased from Beijing Chemical Corp (China). Pt/C (20 wt% Pt on Vulcan XC-72R) and nafion (5 wt %) was purchased from Sigma-Aldrich. nickel foam was provided by Hongshan District, Wuhan Instrument Surgical Instruments Business. The ultrapure water used throughout all experiments through a Millipore system. All chemicals were used as received without further purification.

*Preparation of hydroxide precursor :* In a typical synthesis process, 3 mmol  $\text{NiCl}_2 \cdot 6\text{H}_2\text{O}$ , 1 mmol  $\text{MnCl}_2 \cdot 4\text{H}_2\text{O}$ , 5mmol  $\text{NH}_4\text{F}$ , 5 mmol HMT were dissolved in deionized water (30 mL) in a 50 mL beaker. After continuously stirring for 30 min, the solution was then transferred to a 50 mL Teflonlined stainless steel autoclave with a piece of nickel foam (2 cm  $\times$  3 cm). Then autoclave was sealed and maintained at 90 °C for 6 h in an oven. After the autoclave cooled down to room temperature, the hydroxide precursor was taken out and thoroughly washed with deionized water and ethanol several times alternatively, then dried at 60 °C for 6 h in air. Then the hydroxide precursor was obtained.

*Preparation of Mn-Ni<sub>2</sub>P nanosheet/NF:* The hydroxide precursor was placed in an alumina boat and the other alumina boat containing 1.0 g  $\text{NaH}_2\text{PO}_2$  was placed at the upstream of the tube furnace. The two alumina boats were calcined at 300 °C for 2 h with a heating speed of 2 °C min<sup>-1</sup> under Ar flow and then cooled down to room temperature naturally. Ni<sub>2</sub>P/NF were made, under otherwise identical conditions, without using  $\text{MnCl}_2 \cdot 4\text{H}_2\text{O}$  for hydrothermal preparation.

*Characterization:* The XRD patterns were obtained from a LabX XRD-6100 X-ray diffractometer with Cu K $\alpha$  radiation (40 kV, 30 mA) of wavelength 0.154 nm (SHIMADZU, Japan).The X-ray photoelectron spectroscopy (XPS) measurements were performed on an ESCALABMK II X-ray photoelectron spectrometer using Mg as the exciting source. The scanning electron microscopy (SEM) were collected from the tungsten lamp-equipped SU3500 scanning electron microscope at an accelerating

voltage of 20 kV (HITACHI, Japan). The transmission electron microscopy (TEM) images were obtained from a Zeiss Libra 200FE transmission electron microscope operated at 200 kV. ICP-MS analysis was performed on ThermoScientific iCAP6300.

*Electrochemical measurement:* The electrochemical measurements were performed on a CHI 660E electrochemical workstation (Chenhua, Shanghai). A three-electrode system was used in the experiment: a graphite rod was used as the counter electrode; a mercuric oxide electrode (Hg/HgO) was used as the reference electrode and the as-prepared Mn-Ni<sub>2</sub>P/NF was used as the working electrode. All the measurements were performed at 298 K in 1.0 M KOH solution. The reference electrode was calibrated to the reversible hydrogen electrode (RHE):  $E(\text{RHE}) = E(\text{Hg/HgO}) + (0.098 + 0.059 \text{ pH}) = E(\text{Hg/HgO}) + 0.924 \text{ V}$ .

*TOF<sub>avg</sub> calculations:* The electrochemical active surface area (ECSA) is calculated using the following formula:<sup>1</sup>

$$A_{ECSA}^{\text{Mn-Ni}_2\text{P}} = \frac{C_{dl}}{40 \mu\text{F cm}^{-2} \text{ per cm}^2_{ECSA}}$$

To calculate the TOF<sub>avg</sub>, we used the following formula:<sup>1</sup>

$$TOF_{avg} = \frac{\left( 3.12 \times 10^{15} \times \frac{H_2/s}{\text{cm}^2} \text{ per } \frac{\text{mA}}{\text{cm}^2} \right) \times j}{2.001 \times 10^{15} \times A_{ECSA}}$$

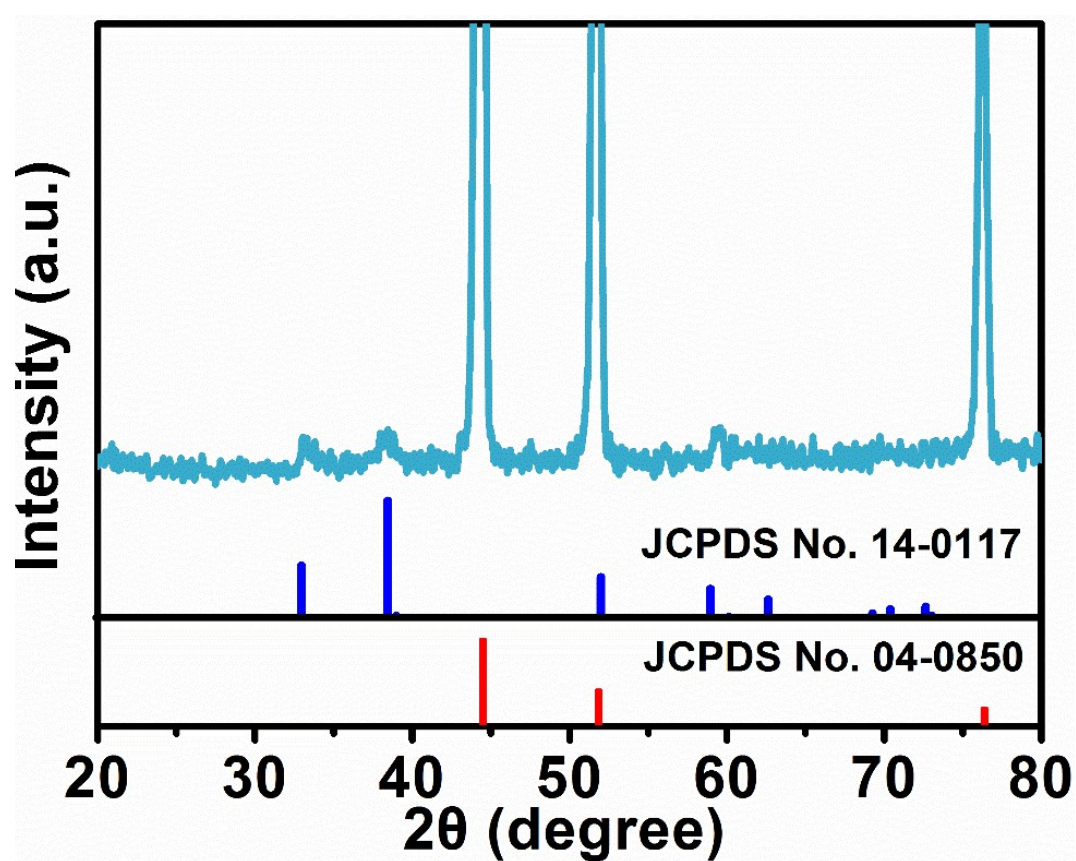

Fig. S1. XRD pattern of hydroxide precursor.

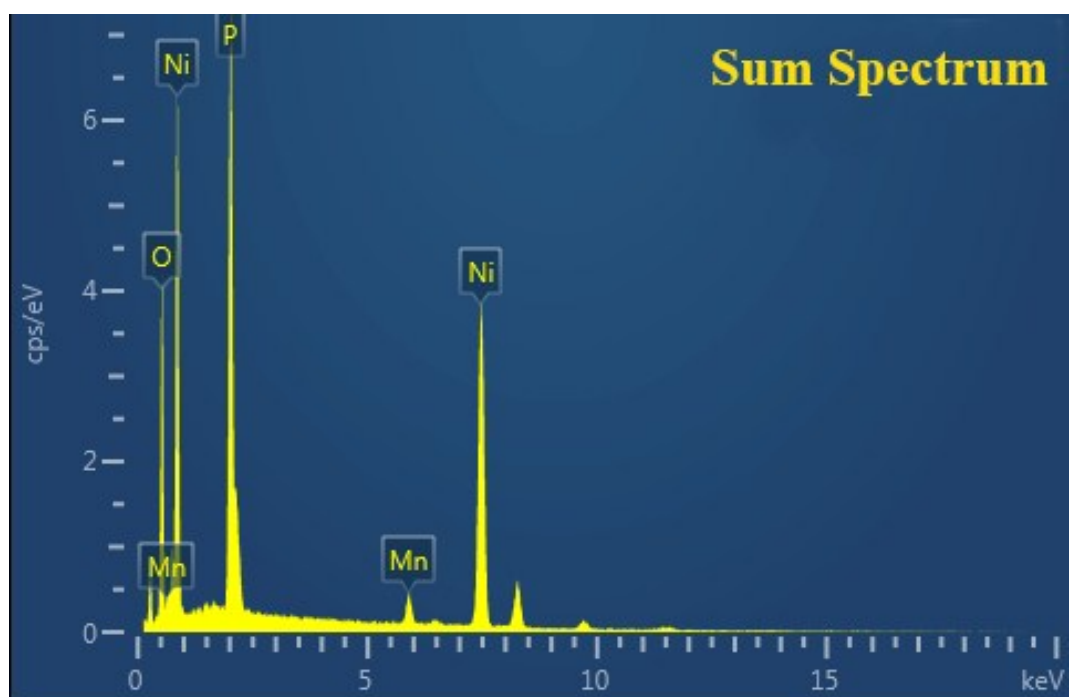

**Fig. S2.** EDX spectrum of Mn-Ni<sub>2</sub>P/NF.

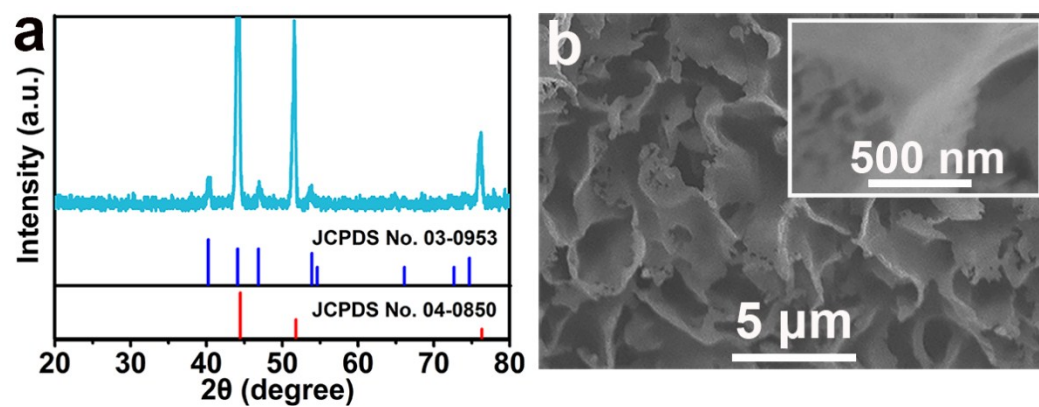

**Fig. S3.** (a) XRD pattern and (b) SEM images of  $\text{Ni}_2\text{P/NF}$

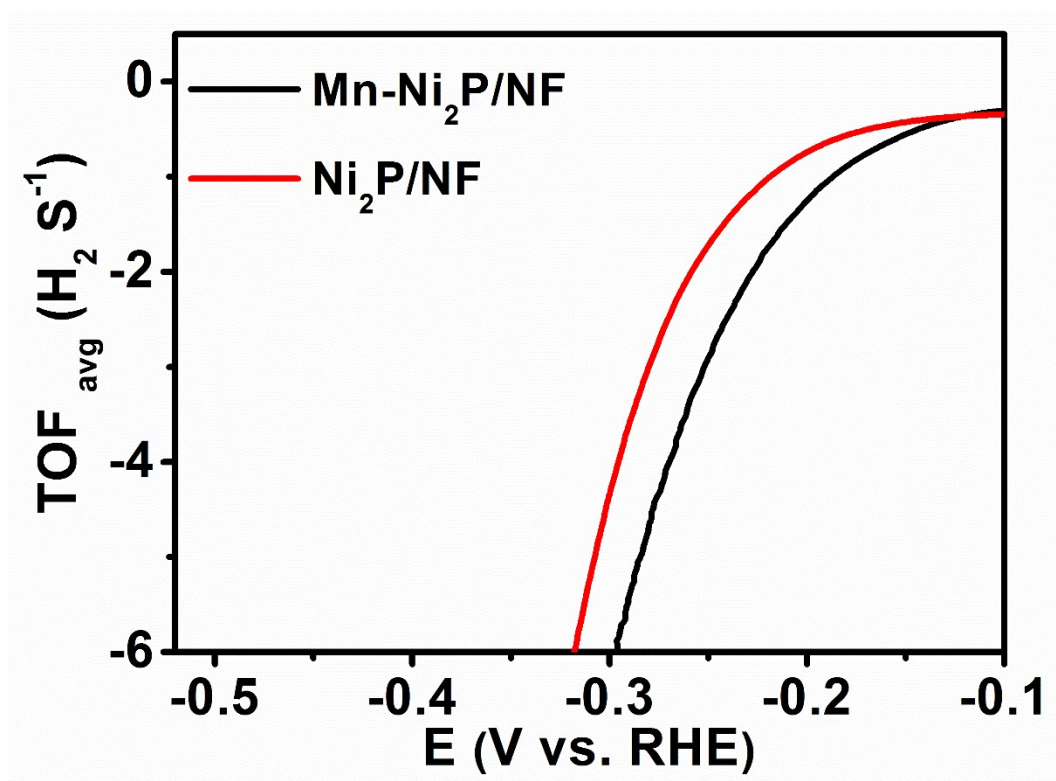

**Fig. S4.**  $\text{TOF}_{\text{avg}}$  calculation of  $\text{Mn-Ni}_2\text{P/NF}$  and  $\text{Ni}_2\text{P/NF}$ .

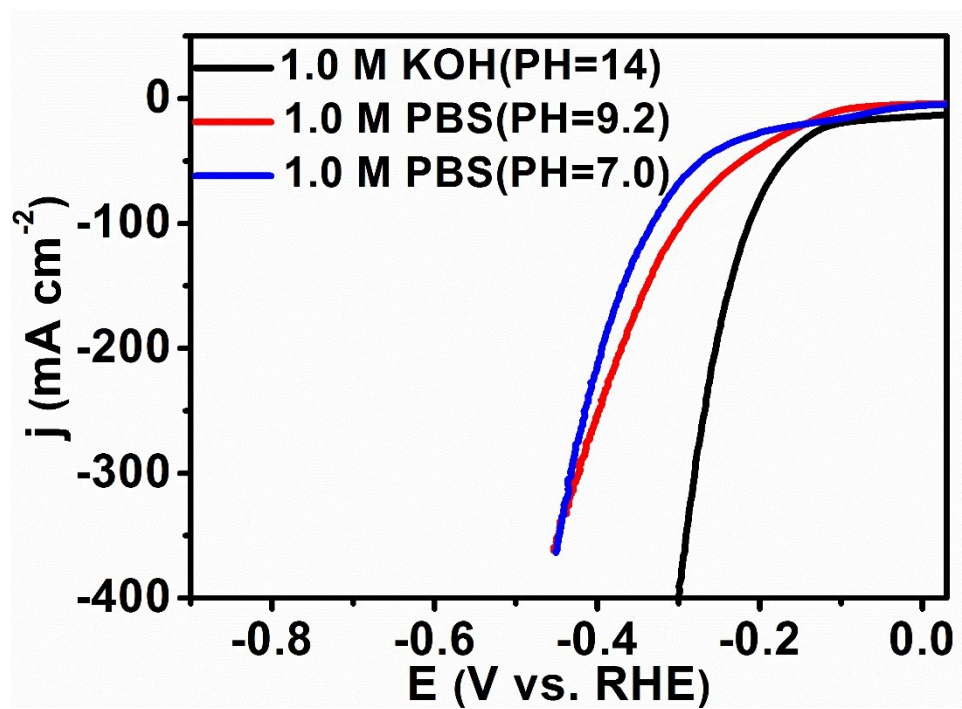

**Fig. S5.** LSV curves for Mn-Ni<sub>2</sub>P/NF in PH=7.0, 9.2, 14 with a scan rate of 5 mVs<sup>-1</sup> for HER with iR correction

**Table S1.** Comparison of HER performance for Mn-Ni<sub>2</sub>P/NF with other non-noble-metal electrocatalysts at 1.0 M KOH

| Catalyst                                             | $j$ (mA cm <sup>-2</sup> ) | $\eta$ (mV) | Reference |
|------------------------------------------------------|----------------------------|-------------|-----------|
| Mn-Ni <sub>2</sub> P/NF                              | 20                         | 103         | This work |
| porous Ni/Ni <sub>3</sub> S <sub>2</sub>             | 20                         | 115         | 2         |
| MoCx/C                                               | 20                         | >175        | 3         |
| H <sub>2</sub> -CoCat                                | 10                         | >-385       | 4         |
| CoOx@CN                                              | 10                         | 270         | 5         |
| MoS <sub>2+x</sub> /FTO                              | 10                         | 310         | 6         |
| CoP/CC                                               | 10                         | 209         | 7         |
| Co-NRCNTs                                            | 20                         | >450        | 8         |
| MoB                                                  | 10                         | >225        | 9         |
| Ni <sub>3</sub> N                                    | 10                         | 208         | 10        |
| NiMoN                                                | 10                         | 109         |           |
| CoP/rGO-400                                          | 10                         | 340         | 11        |
| Ni <sub>3</sub> N/NF                                 | 10                         | 121         | 12        |
| Ni wire                                              | 10                         | 350         | 13        |
| NiS <sub>2</sub> /CC                                 | 10                         | 149         | 14        |
| WP <sub>2</sub> submicroparticles                    | 10                         | 153         | 15        |
| NiFe-LDH/NF                                          | 10                         | 250         | 16        |
| FeP NAs/CC                                           | 10                         | 218         | 17        |
| FeP/Fe foil                                          | 10                         | 194         | 18        |
| CFP-FeP HNA                                          | 10                         | 181         | 19        |
| Co <sub>2</sub> P nanorods                           | 20                         | 171         | 20        |
| Porous Co-P film                                     | 20                         | 410         | 21        |
| Ni <sub>5</sub> P <sub>4</sub> nanosheets on Ni foil | 10                         | 150         | 22        |



|                          |    |     |    |
|--------------------------|----|-----|----|
| WP nanorods/CC           | 10 | 150 | 23 |
| Ni <sub>2</sub> P NSs/CC | 20 | 250 | 24 |
| Ni <sub>2</sub> P/NF     | 15 | 185 | 25 |
| MoP/Ni <sub>2</sub> P/NF | 20 | 110 | 26 |

## References

- 1 J. Kibsgaard, C. Tsai, K. Chan, J. D. Benck, J. K. Nørskov, F. Abild-Pedersen and T. F. Jaramillo, *Energy Environ. Sci.*, 2015, **8**, 3022–3029.
- 2 Y. An, B. Huang, Z. Wang, X. Long, Y. Qiu, J. Hu, D. Zhou, H. Lin and S. Yang, *Dalton Trans.*, 2017, **46**, 10700–10706
- 3 H. Wu, B. Xia, L. Yu, X. Yu, X. Lou, *Nat. Commun.*, 2015, **6**, 6512.
- 4 S. Cobo, J. Heidkamp, P. A. Jacques, J. Fize, V. Fourmond, L. Guetaz, B. Jousselme, V. Ivanova, H. Dau, S. Palacin, M. Fontecave and W. Artero, *Nat. Mater.*, 2012, **11**, 802–807.
- 5 H. Jin, J. Wang, D. Su, Z. Wei, Z. Pang, Y. Wang, *J. Am. Chem. Soc.*, 2015, **137**, 2688–2694.
- 6 C. G. Morales-Guio, L. Liardet, M. T. Mayer, S. D. Tilley, M. Grätzel and X. Hu, *Angew. Chem., Int. Ed.*, 2015, **54**, 664–667.
- 7 J. Tian, Q. Liu, A. M. Asiri and X. Sun, *J. Am. Chem. Soc.*, 2014, **136**, 7587–7590.
- 8 X. Zou, X. Huang, A. Goswami, R. Silva, B. R. Sathe, E. Mikmeková and T. Asefa, *Angew. Chem., Int. Ed.*, 2014, **53**, 4372–4376.
- 9 H. Vrubel and X. Hu, *Angew. Chem., Int. Ed.*, 2012, **51**, 12703–12706.
- 10 Y. Zhang, B. yang, J. Xu, S. Chen, R. S. Rawat and H. Fan, *Adv. Energy Mater.*, 2016, **6**, 1600221.
- 11 L. Jiao, Y. Zhou and H. Jiang, *Chem. Sci.*, 2016, **7**, 1690–1695.
- 12 Z. Xing, Q. Li, D. Wang, X. Yang and X. Sun, *Electrochim. Acta.*, 2016, **191**, 841–845.
- 13 J. McKone, B. Sadtler, C. Werlang, N. Lewis and H. Gray, *ACS Catal.*, 2013, **3**, 166–169.
- 14 C. Tang, Z. Pu, Q. Liu, A.M. Asiri and X. Sun, *Electrochim. Acta.*, 2015, **153**, 508–514.
- 15 Z. Xing, Q. Liu, A.M. Asiri and X. Sun, *ACS Catal.*, 2015, **5** 145–149.
- 16 J. Luo, J. H. Im, M. T. Mayer, M. Schreier, M. K. Nazeeruddin, N. G. Park, S. D. Tilley, H. J. Fan and M. Grätzel, *Science*, 2014, **345**, 1593–1596.

- 17 Y. Liang, Q. Liu, A. M. Asiri, X. Sun and Y. Luo, *ACS Catal.*, 2014, **4**, 4065–4069.
- 18 C. Y. Son, I. H. Kwak, Y. R. Lim and J. Park, *Chem. Commun.*, 2016, **52**, 2819–2822
- 19 C. Lv, Z. Peng, Y. Zhao, Z. Huang and C. Zhang, *J. Mater. Chem. A*, 2016, **4**, 1454–1460.
- 20 Z. Huang, Z. Chen, Z. Chen, C. Lv, M. G. Humphrey and C. Zhang, *Nano Energy*, 2014, **9**, 373–382.
- 21 Y. Yang, H. Fei, G. Ruan and J. M. Tour, *Adv. Mater.*, 2015, **27**, 3175
- 22 M. Ledendecker, S. K. Calderín, C. Papp, H. P. Steinrück, M. Antonietti, and M. Shalom, *Angew. Chem., Int. Ed.*, 2015, **54**, 12361
- 23 Z Pu, Q Liu, A. M. Asiri, and X Sun, *ACS Appl. Mater. Interfaces* ,2014, **6**, 21874–21879
- 24 A. Wang, J. Lin, H. Xu, Y. Tong and G. Li , *J. Mater. Chem. A*, 2016, **4**, 16992–16999.
- 25 Y. Li, H. Zhang, M. Jiang, Y. Kuang, X. Sun and X. Duan, *Nano Res.*, 2016, **9**, 2251–2259.
- 26 C. Du, M. Shang, J. Mao and W. Song, *J. Mater. Chem. A*, 2017, **5**, 15940–15949
